# Supplementary material for: Using Radiofrequency Identification Automated Technologies for Predictive Analytics of Signaling Factors to Determining In-Patient Post Treatment Sleep Quality
Source: Preprints.org preprint supplement (doi:10.20944/preprints201612.0123.v1), 2016-12-25
Supplement: Supplementary file 1 [file supplementary]

**Article Manuscript**

**Title:** Using Radiofrequency Identification Automated Technologies for Predictive Analytics of Signaling Factors to Determining In-Patient Post Treatment of Sleep Quality

**Author List:** Haley Hudson1, Erick Jones2, Dawit Aberra3, Shalini Gupta2, Felicia Jefferson1

**Author Affiliation:** 1 Neuroscience and Bioengineering (NeuBE) Lab, Department of Biology, College of Arts and Sciences, Fort Valley State University.

2 RAID Labs, Department of Industrial, Manufacturing, and Systems Engineering, College of Engineering, University of Texas at Arlington.

3 Department of Mathematics and Computer Sciences, College of Arts and Sciences, Fort Valley State University.

**Abstract:** The supply chain has incorporated products by putting them into hair scarfs.

This study introduces the use of mini chips in health and beauty products and can reduce fatigue through enhanced sleep patterns. The mini chip could be placed in the scarf and used as a prototype. RFID technology provides the supply chain with specific information that is used to identify products and make communication easier. (Muhammad, et. al. 2013)

This paper presents a new tool herein referred to as a scarf prototype which is developed to analyse EMG (electromyogram), ECG (electrocardiography), EEG (electroencephalogram), and EOG (electro-oculogram) signals that focuses in the area of sleep disorders. The mini chips used can be used to determine a solution for sleep disruption by using automated analytics. This could lead to improvement in our understanding of sleep disruption and overall sleep physiology. Automated technology allows repeated measurements, evaluation of sleep patterns, and provide suggestions to improve a person’s quality of sleep. This analysis compares the use of polysomnography and the scarf prototype. The analytics provide models and shows correlation between variables, such as EMG, ECG, EEG, and EOG. This study shows that the results from the scarf prototype is just as reliable as the original method, polysomnography.

**Keywords:** *EMG; EEG; ECG; EOG; Polysomnography*

- **Acknowledgments:** This work was funded in part by a National Science Foundation Grant #14351152-001 awarded to the Fort Valley State University.
- **Author Contributions:** Haley Hudson contributed by researching the feasibility of design, finding the background information on RFID technology, and executing portions of the project. Erick Jones and Shanlini Gupta focused on the calculations in this project and design execution. Felicia Jefferson and Erick Jones conducted the experimental design of the project.
- **Conflicts of Interest:** The authors declare no conflict of interest. The founding sponsors had no role in the design of the study; in the collection, analyses, or interpretation of data; in the writing of the manuscript, and in the decision to publish the results.
- **References:**
- The hospital as an enterprise: management strategies. Stefanini, Angelo. 3, 1997, Tropical Medicine and International Health, Vol. 2, pp. 278-283.
- Stage implementation of RFID in hospitals. Kumar, Sameer, Livermont, Gregory and McKewan, Gregory. 2010, Technology and Health Care, Vol. 18, pp. 31-46.
- Fish, Lynn and Forrest, Wayne. A Worldwide Look at RFID. s.l. : Dow Jones / Factiva.
- RFID in the healthcare supply chain: usage and application. Kumar, Sameer, Swanson, Eric and Tran, Thuy. 1, 2009, International Journal of Health Care Quality Assurance, Vol. 22, pp. 67-81.
- RFID MEDICINE MANAGEMENT SYSTEM. Shieh, Horng-Lin, Lin, Shih-Fong and Chang, Wen-Sheng. Xian : s.n., 2012. 2012 International Conference on Machine Learning and Cybernetics. pp. 15- 17.
- Measuring the Value of RFID Investment: Focusing on RFID Budget Allocation. Lee,In and Lee, Byoung-Chan. 4, 2012, IEEE TRANSACTIONS ON ENGINEERING MANAGEMENT, Vol. 59, pp. 551-559.
- Emerging Technologies in Healthcare: Navigating Risks, Evaluating Rewards.

McGrady, Elizabeth, et al. 5, 2010, Journal of Healthcare Management, Vol. 55, pp.

353-365.

- RFID and Corporate Responsibility: Hidden Costs in RFID Implementation.

Barut, Mehmet, et al. 3, 2006, Business and Society Review, Vol. 111, pp. 287-303.

- RFID in the Pharmaceutical Industry: Addressing Counterfeits with Technology.

Taylor, Douglas. 141, 2014, Journal of Medical Systems, Vol. 38.

- Ayre, Lori. RFID in Libraries: A Step toward Interoperability. 2012.
- RFID systems implementation: a comprehensive framework and a case study.

Ngai, E.W.T., et al. 9, 2010, International Journal of Production Research, Vol. 48, pp. 2583-2612.

- Supply chain replenishment: before-and -after EDI implementation. Leonard, Lori

and Davis, Christine. 3, 2006, Supply Chain Management: An International Journal, Vol.11, pp. 225-232.

[16] Carskadon, Mary A., and William C. Dement. "Normal Human Sleep: An Overview." Principles and Practice of Sleep Medicine (2005): 13-23.

[17] Achermann, Peter, and Alexander A. Borbély. "Sleep Homeostasis and Models of Sleep Regulation." Principles and Practice of Sleep Medicine (2011): 431-44.

[18] Kripke DF, Garfinkel L, Wingard DL, Klauber MR, Marler MR

Arch Gen Psychiatry. 2002 Feb; 59(2):131-6.

[19] Buysse, Daniel. "Chronic Insomnia." Treatment in Psychiatry. N.p., June 2008.
[20] Hered, J. "Genetic Studies in Narcolepsy, a Disorder Affecting REM Sleep." Genetic Studies in Narcolepsy, a Disorder Affecting REM Sleep. N.p., 1999.

[21] Bajraktarov, Stojan et al. “Main Effects of Sleep Disorders Related to Shift Work—opportunities for Preventive Programs.” *The EPMA Journal* 2.4 (2011): 365–370. *PMC*.

[22] Alan R. Schwartz, Susheel P. Patil, Alison M. Laffan, Vsevolod Polotsky, Hartmut Schneider, and Philip L. Smith "Obesity and Obstructive Sleep Apnea", Proceedings of the American Thoracic Society, Vol. 5, No. 2 (2008), pp. 185-192.

[23] FLORENCE PORTIER, ADRIANA PORTMANN, PIERRE CZERNICHOW, LIONEL VASCAUT, ETIENNE DEVIN, DANIEL BENHAMOU, ANTOINE CUVELIER, and JEAN FRANÇOIS MUIR "Evaluation of Home versus Laboratory Polysomnography in the Diagnosis of Sleep Apnea Syndrome", American Journal of Respiratory and Critical Care Medicine, Vol. 162, No. 3 (2000), pp. 814-818.

[24] Marino, Miguel et al. “Measuring Sleep: Accuracy, Sensitivity, and Specificity of Wrist Actigraphy Compared to Polysomnography.” *Sleep* 36.11 (2013): 1747–1755. *PMC*.

[25] Naresh M. Punjabi "The Epidemiology of Adult Obstructive Sleep Apnea", Proceedings of the American Thoracic Society, Vol. 5, No. 2 (2008), pp. 136-143.

[26] Vyas MV, Garg AX, Iansavichus AV, et al. Shift work and vascular events: systematic review and meta-analysis. *BMJ* 2012; 345: e4800

[27] Garcia-Borreguero, Diego et al.The long-term treatment of restless legs syndrome/Willis–Ekbom disease: evidence-based guidelines and clinical consensus best practice guidance: a report from the International Restless Legs Syndrome Study Group. July, 2013 Sleep Medicine , Volume 14 , Issue 7 , 675 – 684

[28] Picchietti D; Winkelman JW. Restless Legs Syndrome, Periodic limb movements in sleep, and depression. SLEEP 2005;28(7): 891-898.

[29] Vandrey, Ryan et al. “Interactions between Disordered Sleep, Post-Traumatic Stress Disorder, and Substance Use Disorders.” *International review of psychiatry (Abingdon, England)* 26.2 (2014): 237–247. *PMC*.

[30] Posttraumatic stress disorder in the National Comorbidity Survey. *Kessler RC, Sonnega A, Bromet E, Hughes M, Nelson CB Arch Gen Psychiatry. 1995 Dec; 52(12):1048-60.*

[31] Sleep disturbances as the hallmark of PTSD: where are we now? Germain Am J Psychiatry. 2013 Apr; 170(4):372-82.

[32] Clinical correlates of poor sleep quality in posttraumatic stress disorder.*Germain A, Buysse DJ, Shear MK, Fayyad R, Austin CJ Trauma Stress. 2004 Dec; 17(6):477-84.*

[33] Additional categories of sleep-related eating disorders and the current status of treatment.*Schenck CH, Hurwitz TD, O'Connor KA, Mahowald MW Sleep. 1993 Aug; 16(5):457-66.*

[34] Longstreth WTJr; Koepsell TD; Ton TG et al. The epidemiology of narcolepsy. SLEEP 2007;30(1):13-26.

[35] Chiang, Yu-Chih, "The effects of sleep on performance of undergraduate students working in the hospitality industry as compared to those who are not working in the industry" (2013). Graduate Theses and Dissertations. Paper 13060.

[36] Swedberg, Claire. "RFID Sensors Track Sleep Patterns." - RFID Journal. N.p., 27 June 2011.

[37] Occhiuzzi, C., and G. Marrocco. "The RFID Technology for Neurosciences: Feasibility of Limbs' Monitoring in Sleep Diseases." IEEE Transactions on Information Technology in Biomedicine IEEE Trans. Inform. Technol. Biomed. 14.1 (2010): 37-43. Jan. 2010.

[38] Collop NA; Anderson WM; Boehlecke B; Claman D; Goldberg R; Gottlieb DJ; Hudgel D; Sateia M; Schwab R. Clinical guidelines for the use of unattended portable monitors in the diagnosis of obstructive sleep apnea in adult patients. J Clin Sleep Med 2007;3(7):737-747.

[39] Drake CL; Roehrs T; Richardson G et al. Shift work sleep dis- order: prevalence and consequences beyond that of symptomatic day workers. SLEEP 2004;27(8):1453-62.

[40] Ralls, Frank M. “Rapid Eye Movement Sleep: Regulation and Function.” *Journal of Clinical Sleep Medicine : JCSM : Official Publication of the American Academy of Sleep Medicine* 9.6 (2013): 635. *PMC*.

[41] Abdul Kadar Muhammad Masum Faruk Bhuiyan & Md. Abul Kalam Azad (2013) *Impact of Radio Frequency Identification (RFID) Technology on Supply Chain Efficiency: An Extensive Study*

[42] Armstrong, S. (2007). Wireless connectivity for health and sports monitoring: a review. *British journal of sports medicine*, *41*(5), 285-289.

[43] Wang, L., & Alexander, C. A. (2013). Telemedicine, Nursing and Medical Management: Applications, Case Studies, and Intelligence from RFID. *American Journal of Nursing Research*, *1*(1), 34-42.

[44] Occhiuzzi, C., & Manocco, G. (2010). The RFID Technology for Neurosciences: Feasibility of Limbs' Monitoring in Sleep Diseases. *IEEE Transactions On Information Technology In Biomedicine*, *14*(1), 37. doi:10.1109/TlTB.2009.2028081

[45] Angeles, Rebecca (2005) ‘Rfid Technologies: Supply- Chain Applications and Implementation Issues’, Information Systems Management, 22:1, 51-65

[46] [Duncan McFarlane](http://www.emeraldinsight.com/author/McFarlane%2C+Duncan), [Yossi Sheffi](http://www.emeraldinsight.com/author/Sheffi%2C+Yossi), (2003) "The Impact of Automatic Identification on Supply Chain Operations", The International Journal of Logistics Management, Vol. 14 Iss: 1, pp.1 – 17

[47] [Mikko Kärkkäinen](http://www.emeraldinsight.com/author/K%C3%A4rkk%C3%A4inen%2C+Mikko), (2003) "Increasing efficiency in the supply chain for short shelf life goods using RFID tagging", International Journal of Retail & Distribution Management, Vol. 31 Iss: 10, pp.529 – 536

[48] Barsam, T., Monazzam, M. R., Haghdoost, A. A., Ghotbi, M. R., & Dehghan, S. F. (2012). Effect of extremely low frequency electromagnetic field exposure on sleep quality in high voltage substations. *Iranian Journal of Environmental Health Science & Engineering, 9*, 1-7.

[49] O'hare, E., Flanagan, D., Penzel, T., Garcia, C., Frohberg, D., & Heneghan, C. (2015). A comparison of radio-frequency biomotion sensors and actigraphy versus polysomnography for the assessment of sleep in normal subjects. *Sleep and Breathing, 19*(1), 91-98

[50] Nayak, R., Singh, A., Padhye, R., & Wang, L. (2015). RFID in textile and clothing manufacturing: Technology and challenges. *Fashion and Textiles, 2*(1),
